# Supplementary material
Source: publisher figshare collection journal article supplement (https://acs.figshare.com/ndownloader/files/3915163)
Supplement: Supplementary file 1 [file 3915163]

# Supporting Information for

## A Rapidly Modulated Multifocal Detection Scheme for Parallel Acquisition of Raman Spectra from a 2-D Focal Array

Lingbo Kong,<sup>1</sup> James Chan<sup>\*,1,2</sup>

<sup>1</sup>Center for Biophotonics, University of California, Davis, Sacramento, CA 95817

<sup>2</sup>Department of Pathology and Laboratory Medicine, University of California, Davis, Sacramento, CA 95817.

### Table of Contents

|                            |                                                                                                                                                                                                                                             |
|----------------------------|---------------------------------------------------------------------------------------------------------------------------------------------------------------------------------------------------------------------------------------------|
| <b>Figure S1- S4:</b>      | Superimposed Raman spectra of the different rows of trapped polystyrene and PMMA beads in the $4 \times 5$ laser tweezers array in Figure 3A for different matrix patterns in equation (1.2).                                               |
| <b>Figure S5 and S6:</b>   | Comparison of measured Raman data (overlapped spectra, 2 sec. acquisition time) and reconstructed individual Raman spectra for rows 1 and 2 of the trapped polystyrene and PMMA beads in the $4 \times 5$ laser tweezers array (Figure 3A). |
| <b>Table S1:</b>           | Calculated total signal intensities ( $1001 \text{ cm}^{-1}$ for polystyrene, $813 \text{ cm}^{-1}$ for PMMA) and signal-to-noise ratios of Raman spectra in Figure S5 and S6.                                                              |
| <b>Detection Patterns:</b> | An example of another set of modulated detection patterns for a $4 \times 5$ laser tweezers array.                                                                                                                                          |

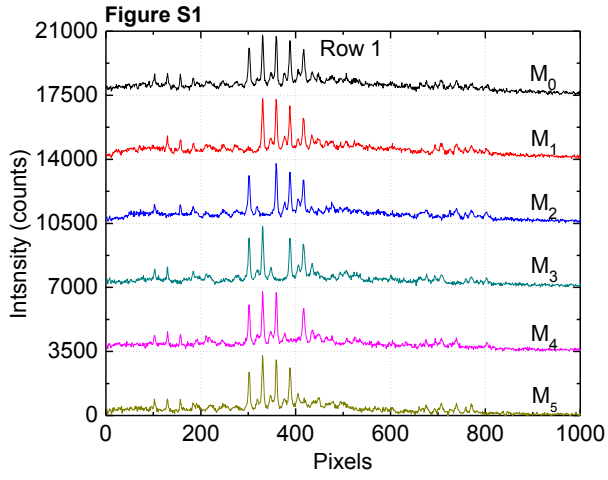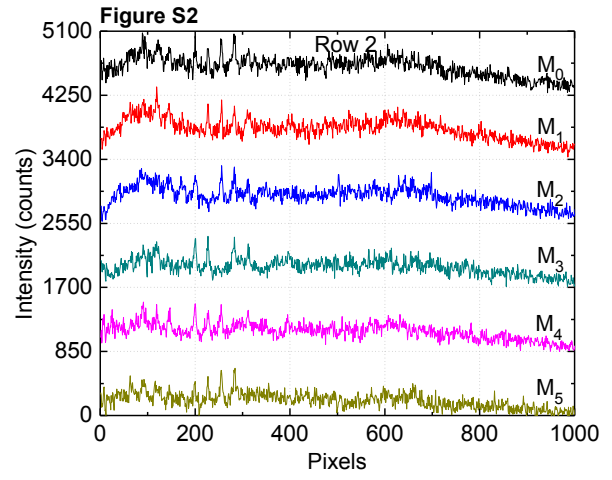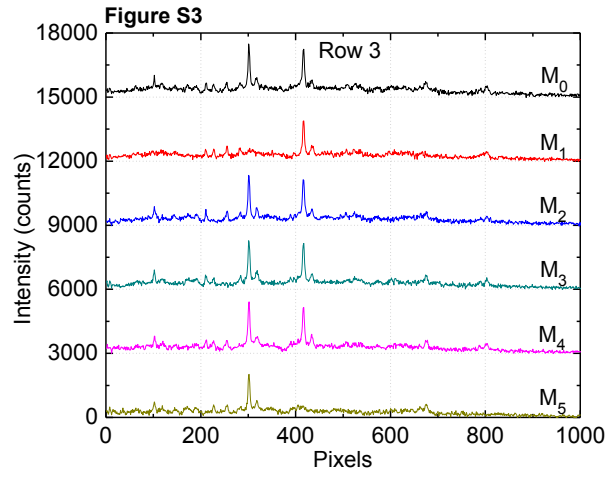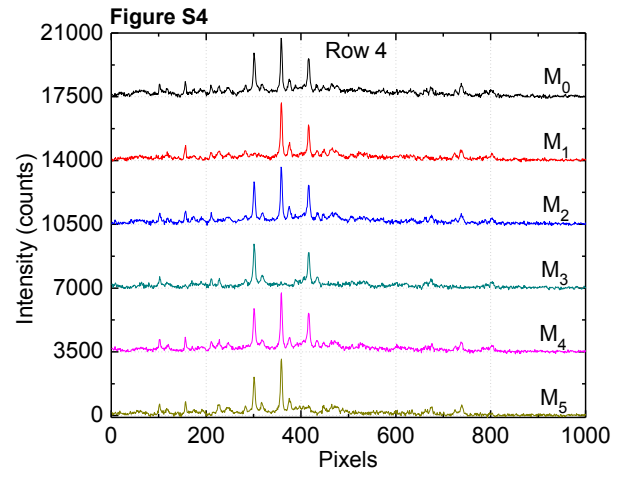

**Figure S1 – S4:** Superimposed Raman spectra of the different rows of trapped polystyrene and PMMA beads in the  $4 \times 5$  laser tweezers array shown in **Figure 3(A)** for different matrix patterns.  $M_0$  is the initial detection pattern where no columns are blocked.  $M_i$  ( $i = 1, \dots, 5$ ) are the five different Raman measurement patterns as shown in equation (1.2).

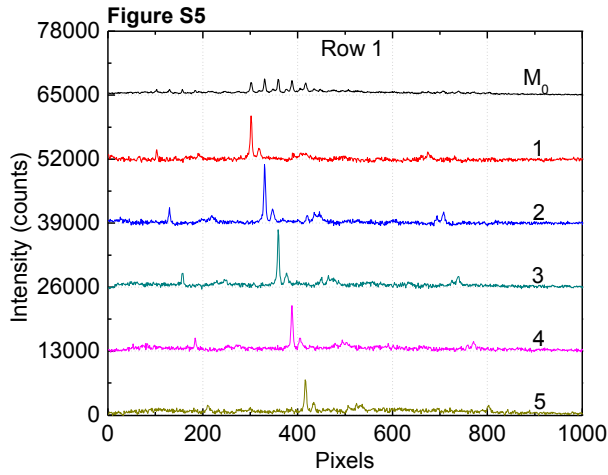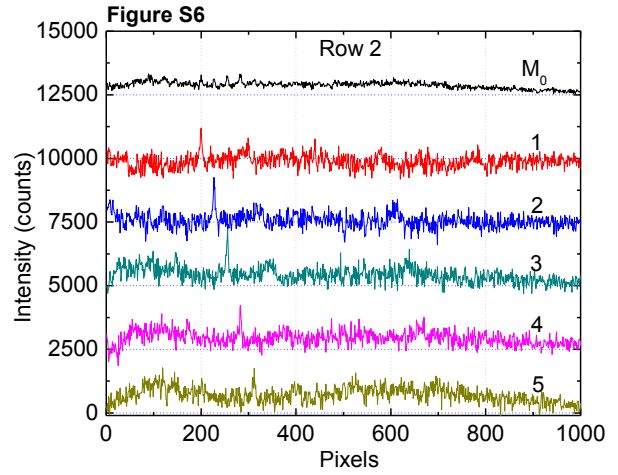

**Figure S5 and S6:** Superimposed and reconstructed Raman spectra of rows 1 and 2 of trapped polystyrene and PMMA beads in the  $4 \times 5$  laser tweezers array shown in **Figure 3(A)**.  $M_0$  is the initial detection pattern where no columns are blocked. Raman spectra labeled as  $n = 1, \dots, 5$  are the reconstructed individual spectra as shown in **Figures 3(C) and 3(D)**.

**Table S1**

| Intensity of Raman peak (counts) |                       | <b>1</b> | <b>2</b> | <b>3</b> | <b>4</b> | <b>5</b> |
|----------------------------------|-----------------------|----------|----------|----------|----------|----------|
| Row 1:<br>polystyrene            | Measured spectra      | 2025     | 2734     | 2650     | 2421     | 1944     |
|                                  | Reconstructed spectra | 8782     | 11934    | 11329    | 8741     | 6546     |
| Row 2:<br>PMMA                   | Measured spectra      | 384      | 289      | 399      | 423      | 211      |
|                                  | Reconstructed spectra | 1445     | 1743     | 1824     | 1376     | 1181     |

| Signal-to-noise ratio |                       | <b>1</b> | <b>2</b> | <b>3</b> | <b>4</b> | <b>5</b> |
|-----------------------|-----------------------|----------|----------|----------|----------|----------|
| Row 1:<br>polystyrene | Measured spectra      | 35.2     | 47.5     | 46.0     | 42.0     | 33.8     |
|                       | Reconstructed spectra | 47.8     | 79.6     | 74.7     | 56.7     | 44.7     |
| Row 2:<br>PMMA        | Measured spectra      | 6.8      | 5.2      | 7.1      | 7.5      | 3.8      |
|                       | Reconstructed spectra | 9.0      | 9.9      | 10.8     | 9.0      | 6.4      |

**Table S1:** Raman peak intensities ( $1001 \text{ cm}^{-1}$  of polystyrene and  $813 \text{ cm}^{-1}$  of PMMA) and signal-to-noise ratios of Raman spectra in **Figure S5** and **S6** for trapped particles 1 to 5. Measured spectra: Raman spectra (2 second acquisition) shown in the top of **Figure S5** and **S6**; they are the measured spectra with initial detection pattern where no columns are blocked. Reconstructed spectra: Reconstructed individual Raman spectra (8 second acquisition) in rows 1 and 2 after the post data processing using equation (1.4). The signal-to-noise ratio was estimated by using the peak intensity (at  $1001 \text{ cm}^{-1}$  for polystyrene or at

813 cm<sup>-1</sup> for PMMA) divided by the peak-to-peak noise of the background (standard deviation of the background between 1800 to 1900 cm<sup>-1</sup>).

### Detection Patterns

The five simple mask patterns (matrices in (1.2)) presented in the main text are just one example of the modulated detection that can be used for the  $4 \times 5$  ( $m \times n$ ) laser tweezers array. The following five mask patterns are another example:

$$\begin{aligned} M_1 &= \begin{pmatrix} 0 & 1 & 0 & 0 & 1 \\ 0 & 1 & 0 & 0 & 1 \\ 0 & 1 & 0 & 0 & 1 \\ 0 & 1 & 0 & 0 & 1 \end{pmatrix}, M_2 = \begin{pmatrix} 1 & 0 & 1 & 0 & 0 \\ 1 & 0 & 1 & 0 & 0 \\ 1 & 0 & 1 & 0 & 0 \\ 1 & 0 & 1 & 0 & 0 \end{pmatrix}, M_3 = \begin{pmatrix} 0 & 1 & 0 & 1 & 0 \\ 0 & 1 & 0 & 1 & 0 \\ 0 & 1 & 0 & 1 & 0 \\ 0 & 1 & 0 & 1 & 0 \end{pmatrix}, \\ M_4 &= \begin{pmatrix} 0 & 0 & 1 & 0 & 1 \\ 0 & 0 & 1 & 0 & 1 \\ 0 & 0 & 1 & 0 & 1 \\ 0 & 0 & 1 & 0 & 1 \end{pmatrix}, M_5 = \begin{pmatrix} 1 & 0 & 0 & 1 & 0 \\ 1 & 0 & 0 & 1 & 0 \\ 1 & 0 & 0 & 1 & 0 \\ 1 & 0 & 0 & 1 & 0 \end{pmatrix}; \end{aligned} \quad (\text{S1. 1})$$

The individual Raman spectra of the  $m'$ th row can be reconstructed by the following linear equations:

$$\begin{pmatrix} 0 & 1 & 0 & 0 & 1 \\ 1 & 0 & 1 & 0 & 0 \\ 0 & 1 & 0 & 1 & 0 \\ 0 & 0 & 1 & 0 & 1 \\ 1 & 0 & 0 & 1 & 0 \end{pmatrix} \begin{pmatrix} I_{m1} \\ I_{m2} \\ I_{m3} \\ I_{m4} \\ I_{m5} \end{pmatrix} = \begin{pmatrix} I_1^m \\ I_2^m \\ I_3^m \\ I_4^m \\ I_5^m \end{pmatrix}; \quad (\text{S1. 2})$$

The solutions for these equations are:

$$\begin{aligned} 2(I_{m1}) &= I_1^m + I_2^m - I_3^m - I_4^m + I_5^m; \\ 2(I_{m2}) &= I_1^m + I_2^m + I_3^m - I_4^m - I_5^m; \\ 2(I_{m3}) &= -I_1^m + I_2^m + I_3^m + I_4^m - I_5^m; \\ 2(I_{m4}) &= -I_1^m - I_2^m + I_3^m + I_4^m + I_5^m; \\ 2(I_{m5}) &= I_1^m - I_2^m - I_3^m + I_4^m + I_5^m; \end{aligned} \quad (\text{S1. 3})$$

For a specific  $m \times n$  laser tweezers array, the best signal to noise ratio of the reconstructed spectra can be realized by choosing the appropriate/optimal detection patterns.
